# Supplementary material
Source: HighWire-hosted journal article supplement (https://fn.bmjjournals.com/content/suppl/2004/03/22/88.6.F492)
Supplement: 886F492App1b.pdf [file 886F492App1b.pdf]

Appendix 1b. Effect of factors on being of very low weight and and very small head circumference (SD score <-3) at 30 months postnatal corrected age. Odds ratios calculated from univariate logistic regression.

| Variable (yes vs no unless otherwise stated)                         | Standard deviation score below -3SDs                  |                                           |
|----------------------------------------------------------------------|-------------------------------------------------------|-------------------------------------------|
|                                                                      | Head circumference<br>(43/277)<br>Odds ratio (95% CI) | Weight<br>(22/270)<br>Odds ratio (95% CI) |
| <b>Pre-pregnancy</b>                                                 |                                                       |                                           |
| Ethnicity of mother                                                  |                                                       |                                           |
| Indian sub cont                                                      | 6.46 (2.28, 18.32)***                                 | (0/16) p=0.38 <sup>b</sup>                |
| White                                                                | 0.67 (0.32, 1.39)                                     | 2.98 (0.68, 13.15)                        |
| Black                                                                | 0.43 (0.13, 1.45)                                     | 0.59 (0.13, 2.63)                         |
| Primip                                                               | 0.71 (0.34, 1.49)                                     | 1.89 (0.78, 4.55)                         |
| Two or more previous deaths                                          | 0.80 (0.36, 1.77)                                     | 0.46 (0.13, 1.62)                         |
| <b>In pregnancy</b>                                                  |                                                       |                                           |
| Male                                                                 |                                                       |                                           |
| Singleton                                                            | 0.59 (0.30, 1.16)                                     | 0.92 (0.38, 2.20)                         |
| Maternal smoking in pregnancy                                        | 0.81 (0.40, 1.66)                                     | 0.65 (0.26, 1.61)                         |
| Pre- eclampsia                                                       | 0.85 (0.41, 1.76)                                     | 1.73 (0.70, 4.29)                         |
| Antepartum haemorrhage                                               | 0.77 (0.09, 6.38)                                     | (0/8) p=1.0 <sup>b</sup>                  |
| Chorioamnionitis                                                     | 1.54 (0.75, 3.16)                                     | 2.58 (1.05, 6.37)*                        |
| Premature rupture of membranes                                       | 0.72 (0.31, 1.64)                                     | 1.62 (0.63, 4.17)                         |
| Cervical suture                                                      | 0.99 (0.47, 2.08)                                     | 0.79 (0.28, 2.21)                         |
| Any antenatal steroids given                                         | 1.15 (0.37, 3.56)                                     | (0/24) p=0.24 <sup>b</sup>                |
| Any tocolytics given                                                 | 0.68 (0.32, 1.45)                                     | 0.78 (0.27, 2.22)                         |
| Any tocolytics given                                                 | 1.54 (0.78, 3.02)                                     | 0.60 (0.21, 1.67)                         |
| <b>At birth</b>                                                      |                                                       |                                           |
| Caesarean section                                                    | 0.38 (0.11, 1.27)                                     | 0.50 (0.11, 2.24)                         |
| Vaginal breech delivery                                              | 1.31 (0.64, 2.69)                                     | 1.13 (0.42, 3.00)                         |
| OFC SD score (national standards) (per SD)                           | 0.93 (0.64, 1.37)                                     | 0.61 (0.34, 1.08)                         |
| OFC for birthweight (from admitted infants) (per cm)                 | 1.02 (0.71, 1.48)                                     | 0.76 (0.43, 1.36)                         |
| OFC for gest age (from admitted infants) (per cm)                    | 0.86 (0.62, 1.18)                                     | 0.67 (0.42, 1.09)                         |
| Birthweight SD score (from admitted babies) (per SD)                 | 0.62 (0.44, 0.88)**                                   | 0.52 (0.32, 0.84)**                       |
| Birthweight SD score (National standards) (per SD)                   | 0.70 (0.47, 1.04)                                     | 0.50 (0.29, 0.87)*                        |
| Birthweight (per 100g)                                               | 0.59 (0.43, 0.80)***                                  | 0.54 (0.35, 0.82)**                       |
| Gestational age (per week)                                           | 0.68 (0.44, 1.05)                                     | 0.69 (0.39, 1.22)                         |
| <b>During 1st day of life</b>                                        |                                                       |                                           |
| Crib score (some estimated) (per unit)                               | 1.14 (1.03, 1.26)**                                   | 1.22 (1.07, 1.39)**                       |
| Fetal heart rate > 100bpm                                            | 1.53 (0.34, 6.92)                                     | (0/16), p=0.38 <sup>b</sup>               |
| Temperature <sup>3</sup> 35°C                                        | 0.53 (0.26, 1.09)                                     | 0.41 (0.16, 1.06)                         |
| First chest radiograph 3 or 4 vs 1, 2 or missing result <sup>a</sup> | 0.92 (0.45, 1.86)                                     | 2.04 (0.84, 4.93)                         |
| Any surfactant given                                                 | 1.77 (0.60, 5.27)                                     | 1.75 (0.39, 7.82)                         |
| Moved hospital in first 24hrs                                        | 1.24 (0.48, 3.22)                                     | 2.41 (0.82, 7.05)                         |
| <b>In hospital</b>                                                   |                                                       |                                           |
| Treatment for PDA                                                    | 0.83 (0.43, 1.60)                                     | 1.50 (0.62, 3.65)                         |
| Pulmonary haemorrhage                                                | 1.28 (0.41, 3.99)                                     | 1.86 (0.50, 6.86)                         |
| Any systemic steroids for chronic lung disease                       | 1.70 (0.75, 3.87)                                     | 0.98 (0.37, 2.60)                         |
| Enteral feeding begun by day 7                                       | 0.65 (0.33, 1.27)                                     | 0.63 (0.26, 1.55)                         |
| Total parenteral nutrition given                                     | 0.35 (0.08, 1.46)                                     | (0/9) p=1.0 <sup>b</sup>                  |
| Any breast milk given                                                | 0.36 (0.16, 0.77)**                                   | 0.31 (0.12, 0.82)*                        |
| Definite or probable diagnosis of necrotising enterocolitis          | 7.47 (2.17, 25.75)***                                 | 5.30 (1.27, 22.17)*                       |
| Treatment for retinopathy of prematurity                             | 2.48 (1.15, 5.35)*                                    | 0.88 (0.25, 3.12)                         |
| Ventriculomegaly or parenchymal cysts on last USS                    | 2.02 (0.93, 4.39)                                     | 2.01 (0.74, 5.46)                         |
| Systemic steroids for chronic lung disease (per week)                | 1.09 (0.98, 1.20)                                     | 1.07 (0.94, 1.21)                         |
| >8 weeks of systemic steroids for chronic lung disease               | 1.38 (0.37, 5.09)                                     | 3.08 (0.80, 11.86)                        |
| In oxygen at 36wks PMA                                               | 1.98 (0.84, 4.67)                                     | 0.97 (0.36, 2.58)                         |
| In oxygen at 40wks PMA                                               | 1.78 (0.91, 3.47)                                     | 1.14 (0.48, 2.74)                         |
| Discharged in oxygen                                                 | 2.21 (1.14, 4.26)*                                    | 1.41 (0.57, 3.49)                         |
| Post menstrual age at discharge (per week)                           | 1.12 (1.05, 1.20)***                                  | 1.13 (1.04, 1.23)**                       |
| <b>Post discharge</b>                                                |                                                       |                                           |
| Admissions to hospital (per cat 0,1,2,3,4+)                          | 1.04 (0.82, 1.32)                                     | 1.04 (0.76, 1.44)                         |
| <b>Child's state at 30 months</b>                                    |                                                       |                                           |
| Feeding problems                                                     | 4.30 (2.17, 8.49)***                                  | 2.72 (1.12, 6.56)*                        |
| Severe neuromotor delay                                              | 6.33 (2.75, 14.58)***                                 | 4.05 (1.43, 11.46)**                      |
| Neuromotor delay (per cat none, any, severe)                         | 2.55 (1.68, 3.89)***                                  | 2.46 (1.46, 4.17)***                      |
| MDI score (per 10 points) if MDI>49                                  | 0.88 (0.61, 1.27)                                     | 0.75 (0.48, 1.16)                         |
| PDI score (per 10 points) if PDI>49                                  | 0.92 (0.66, 1.29)                                     | 0.91 (0.60, 1.38)                         |
| <b>Social conditions at 30 months</b>                                |                                                       |                                           |
| Manual vs non-manual (adjusted for other)                            | 1.35 (0.54, 3.35)                                     | 0.65 (0.20, 2.12)                         |
| Other vs non-manual (adjusted for manual)                            | 1.89 (0.80, 4.49)                                     | 1.19 (0.42, 3.36)                         |
| Other vs manual or non-manual                                        | 1.60 (0.81, 3.17)                                     | 1.46 (0.59, 3.62)                         |
| Maternal smoking at home                                             | 1.08 (0.55, 2.10)                                     | 2.47 (1.00, 6.09)*                        |
| Mother's age at birth (per 10y)                                      | 0.84 (0.48, 1.47)                                     | 0.57 (0.27, 1.22)                         |
| Mother has GCSE or equivalent.                                       | 0.50 (0.26, 0.96)*                                    | 0.43 (0.17, 1.05)                         |
| Two or more older children in the household.                         | 1.57 (0.75, 3.31)                                     | 1.12 (0.40, 3.19)                         |
| Has car                                                              | 1.38 (0.51, 3.75)                                     | 1.06 (0.30, 3.80)                         |
| Lives with biological father                                         | 0.75 (0.20, 2.77)                                     | 0.63 (0.13, 2.99)                         |

legend

- \*  $p \leq 0.05$
- \*\*  $p \leq 0.01$
- \*\*\*  $P \leq 0.001$

- a chest radiograph scored in four categories, 1-clear, 2-respiratory distress syndrome (RDS) pattern with heart border seen, 3-RDS pattern with most of heart border obscured, 4- white out. (22 cases with no result of CXR)
- b no yeses to factor in those with SD score  $< -3$ . figures are number of yeses with SD score  $< -3$  out of number of yeses. P-values are calculated using Fisher's exact test.
